# Supplementary material for: Single-cell RNA sequencing reveals distinct transcriptomic profiles and evolutionary patterns in lung cancer brain metastasis
Source: PubMed Central journal article supplement — Heliyon. 2024 Feb 24;10(5):e27071. doi: 10.1016/j.heliyon.2024.e27071 (PMC10920378; doi:10.1016/j.heliyon.2024.e27071), 2024-02-24

# B lymphocytes

Identity

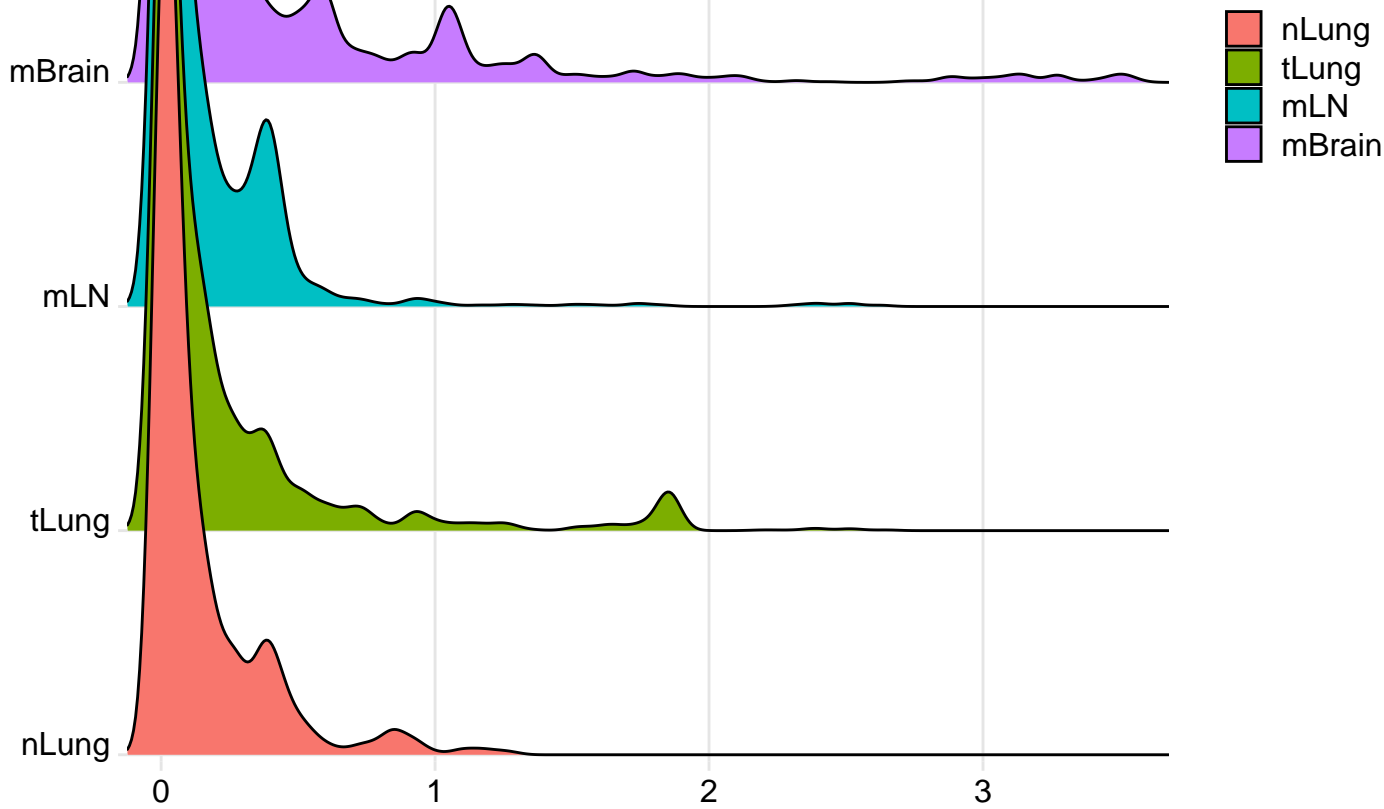

# Endothelial cells

Identity

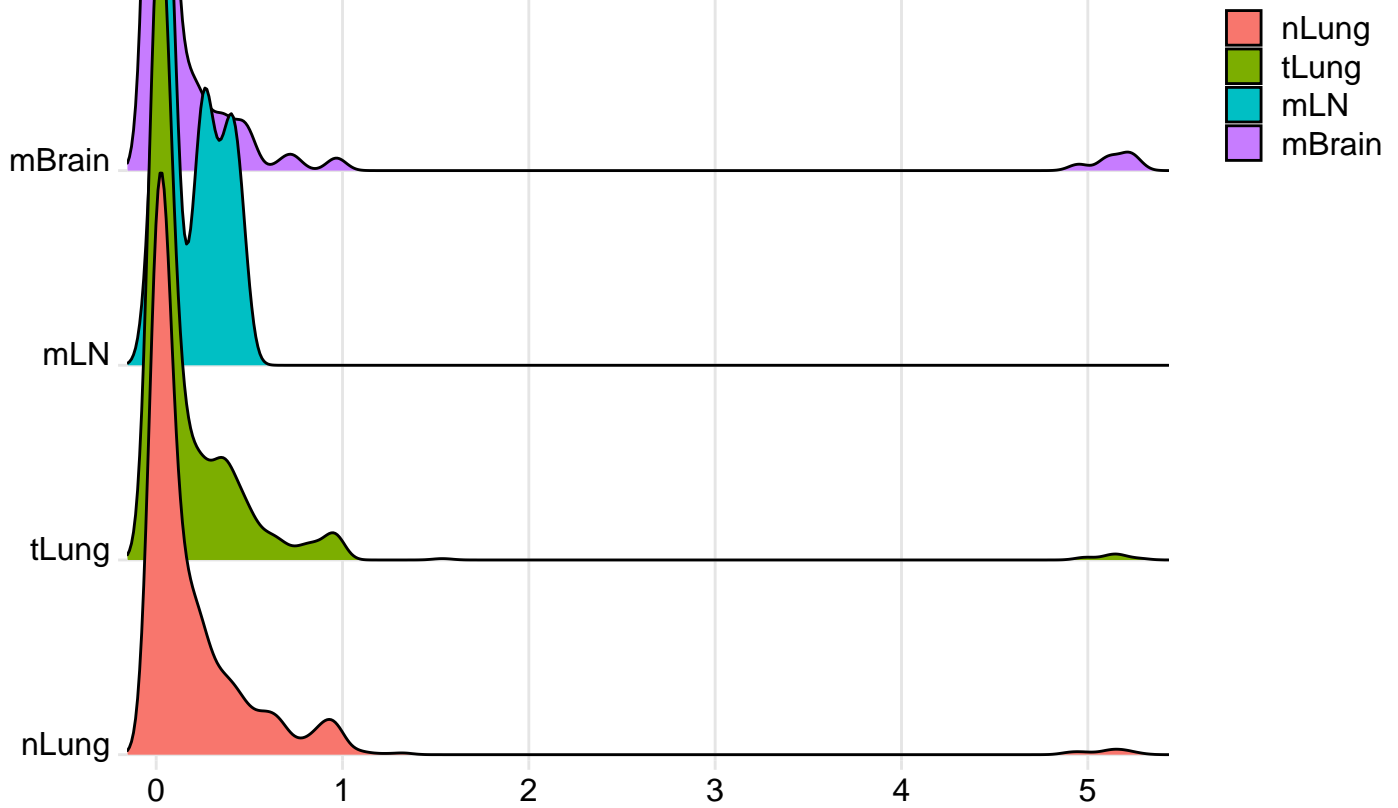

# Epithelial cells

Identity

mBrain

mLN

tLung

nLung

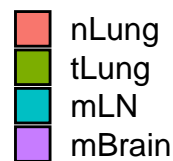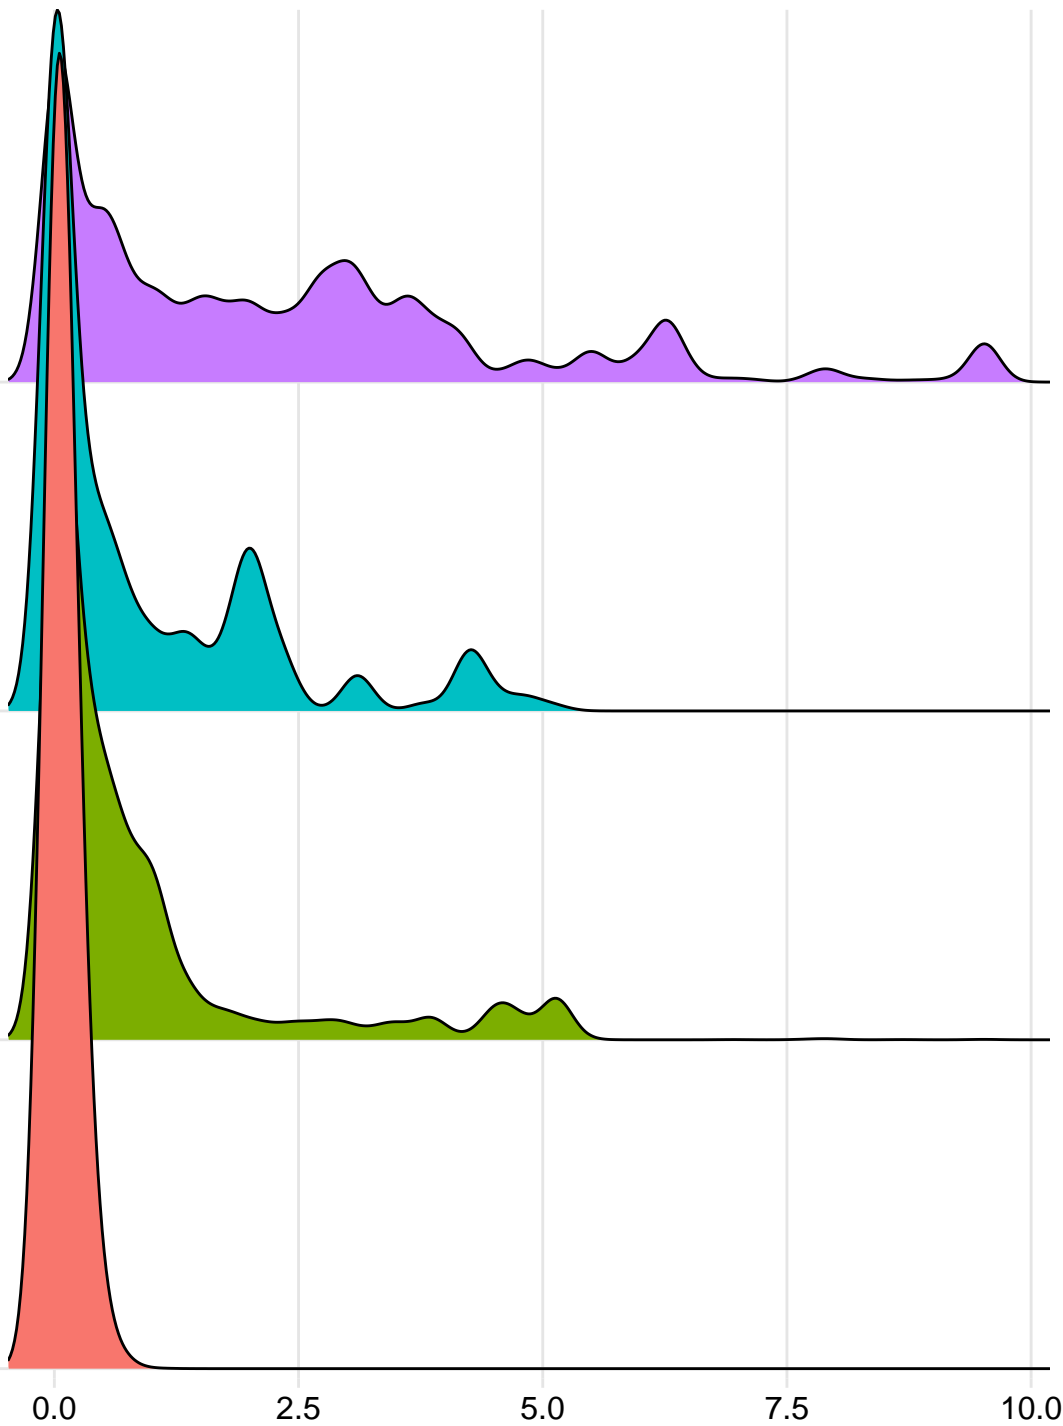

# Fibroblasts

Identity

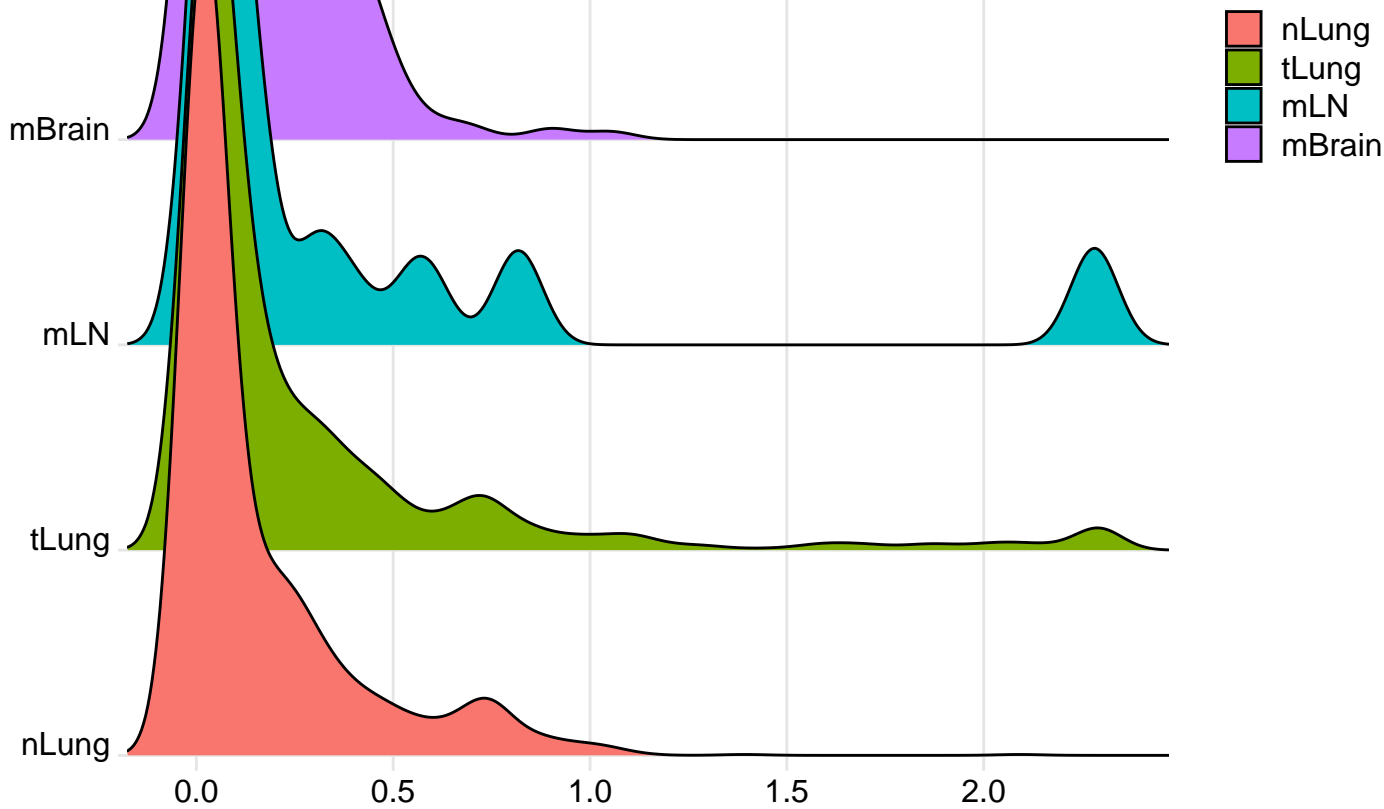

# MAST cells

Identity

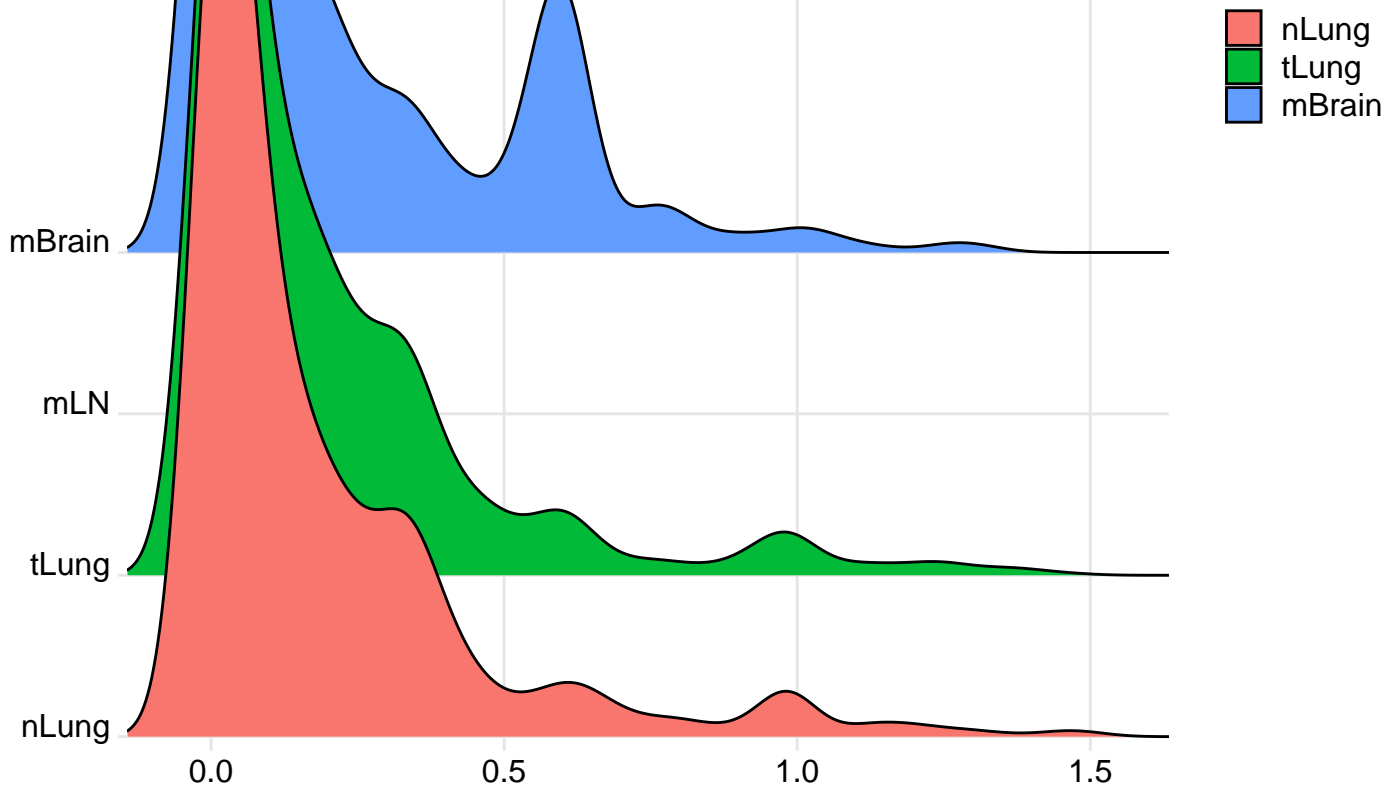

# Myeloid cells

Identity

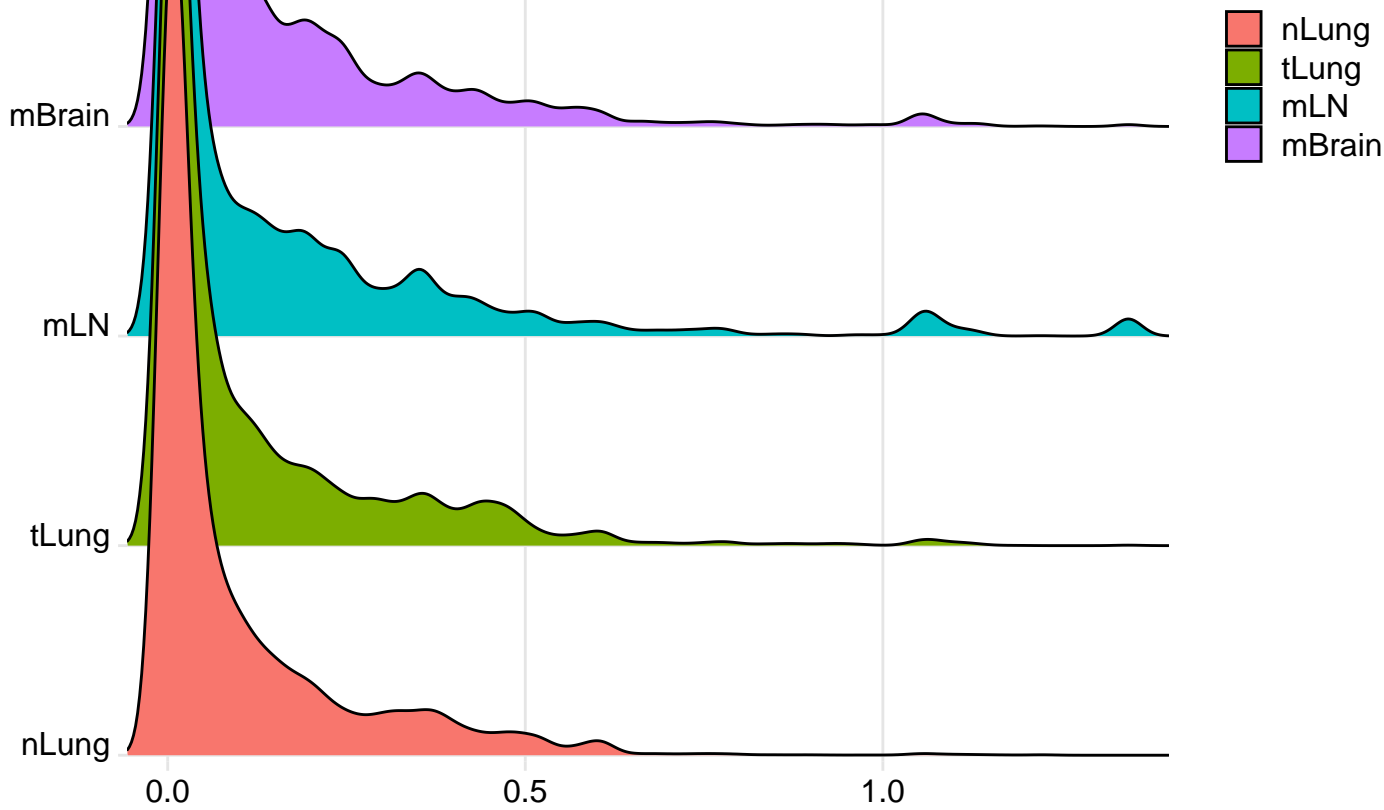

# T/NK cells

Identity

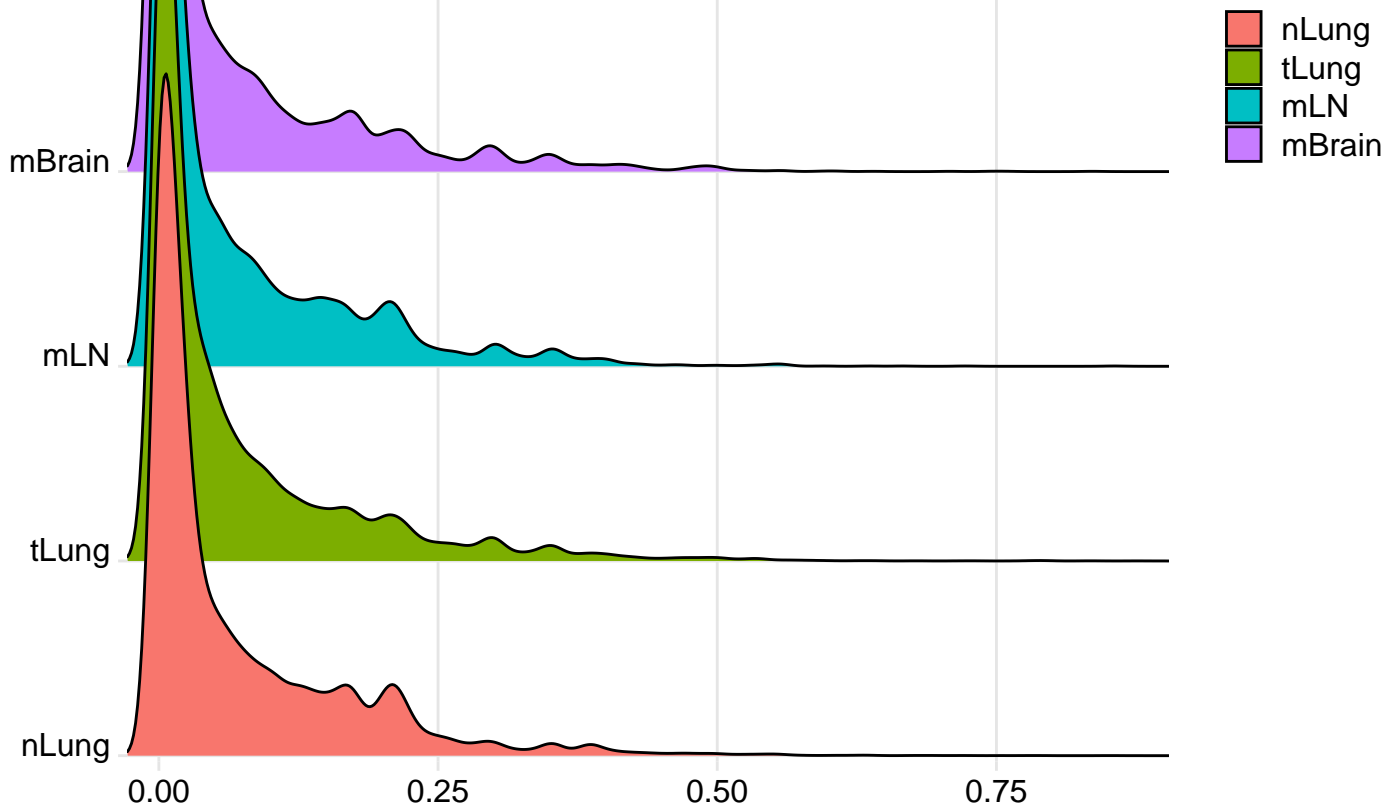

Supplement: mmc3.pdf [file mmc3.pdf]
