# Supplementary figures and images for: Single-cell RNA sequencing reveals distinct transcriptomic profiles and evolutionary patterns in lung cancer brain metastasis
Source: PubMed Central journal article supplement — Heliyon. 2024 Feb 24;10(5):e27071. doi: 10.1016/j.heliyon.2024.e27071 (PMC10920378; doi:10.1016/j.heliyon.2024.e27071), 2024-02-24

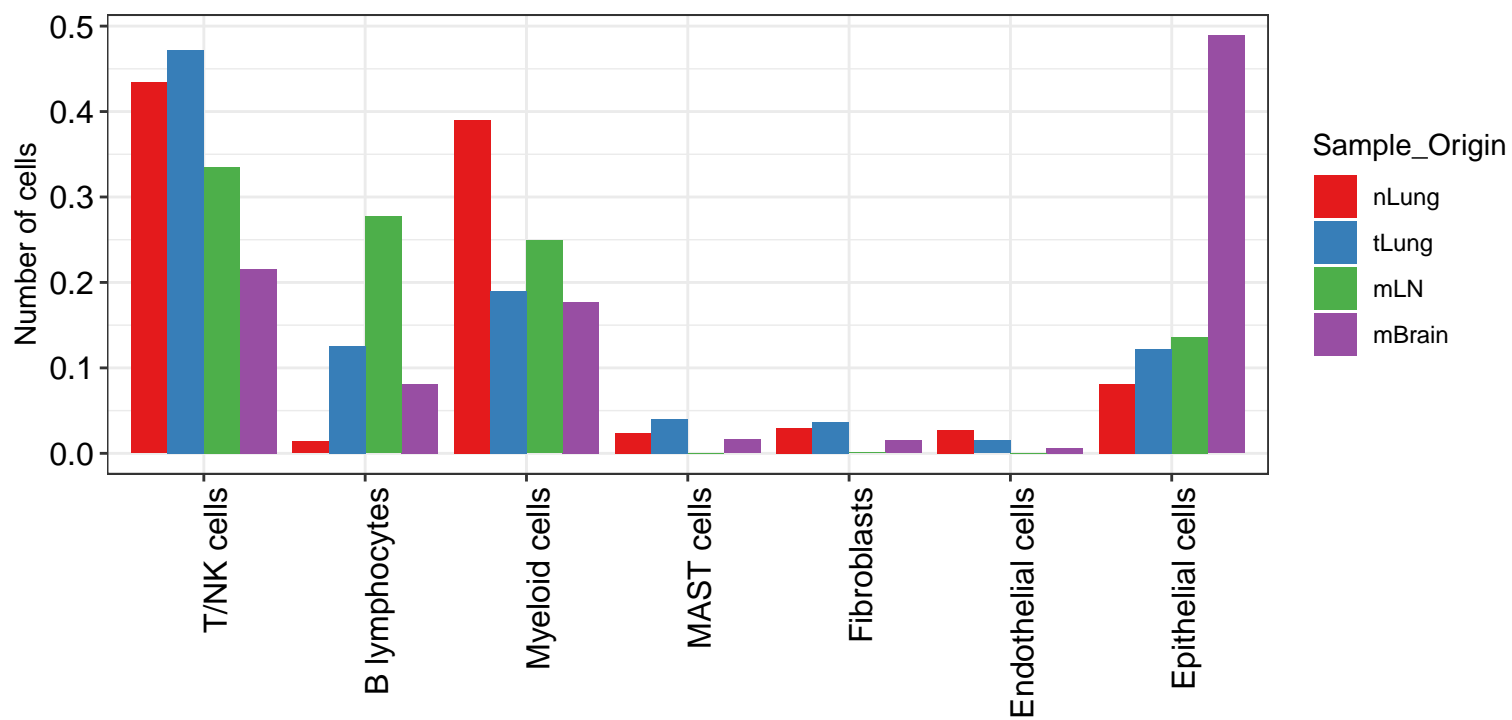

Supplement: mmc1.pdf [file mmc1.pdf]

## T cells

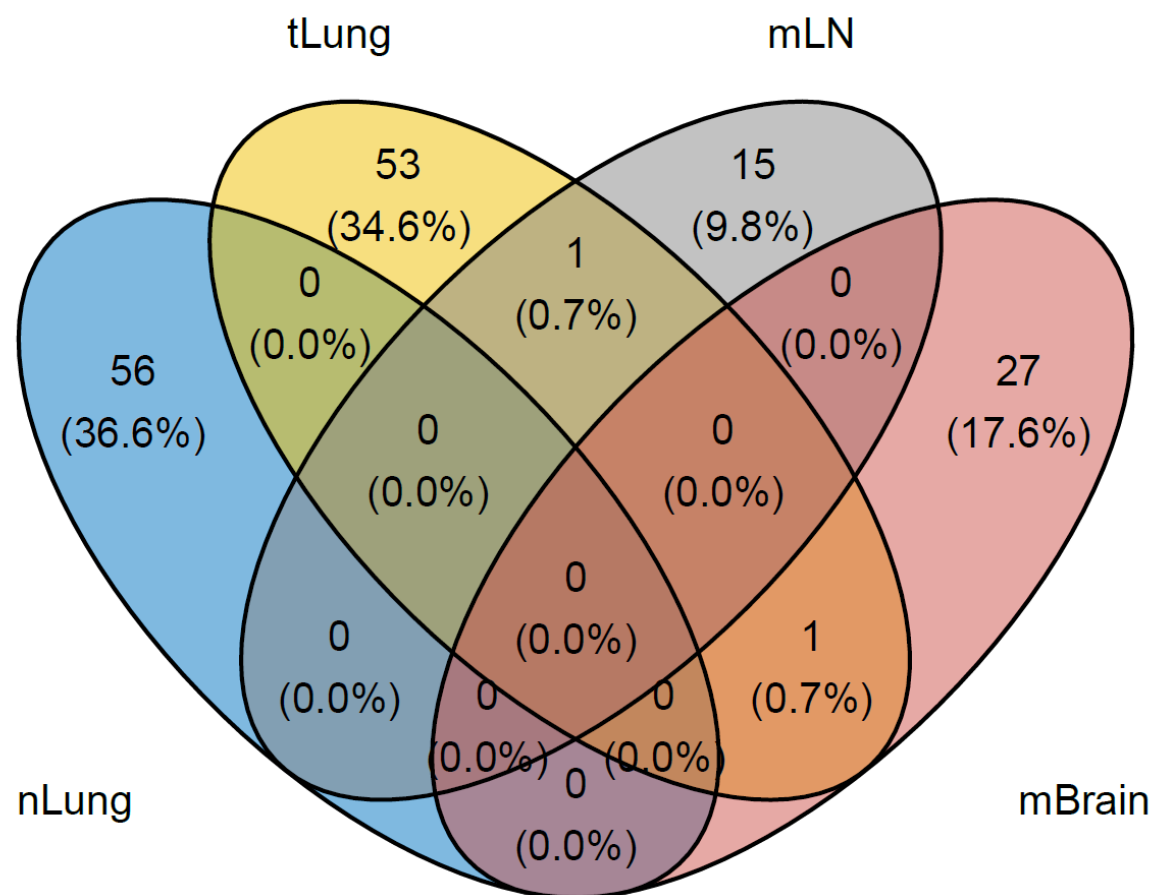

## B cells

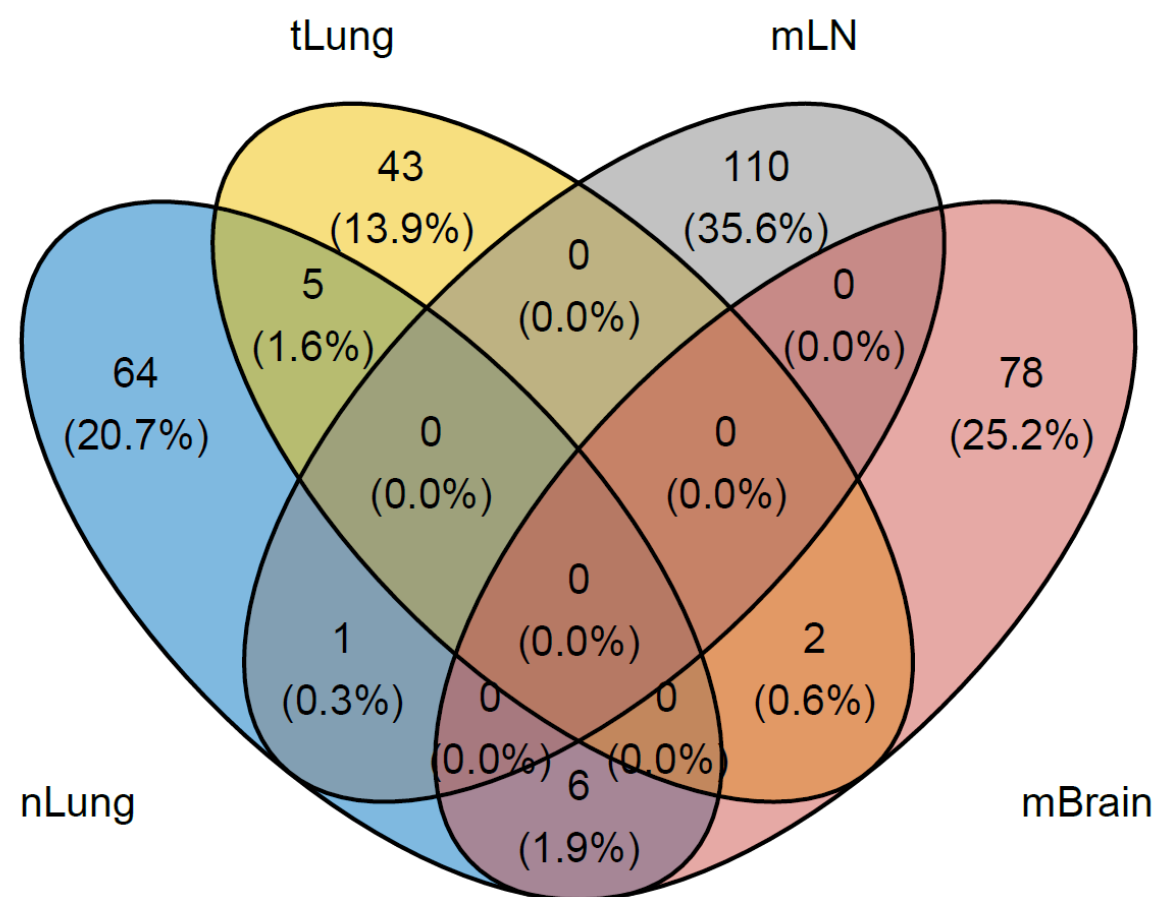

## Myeloid cells

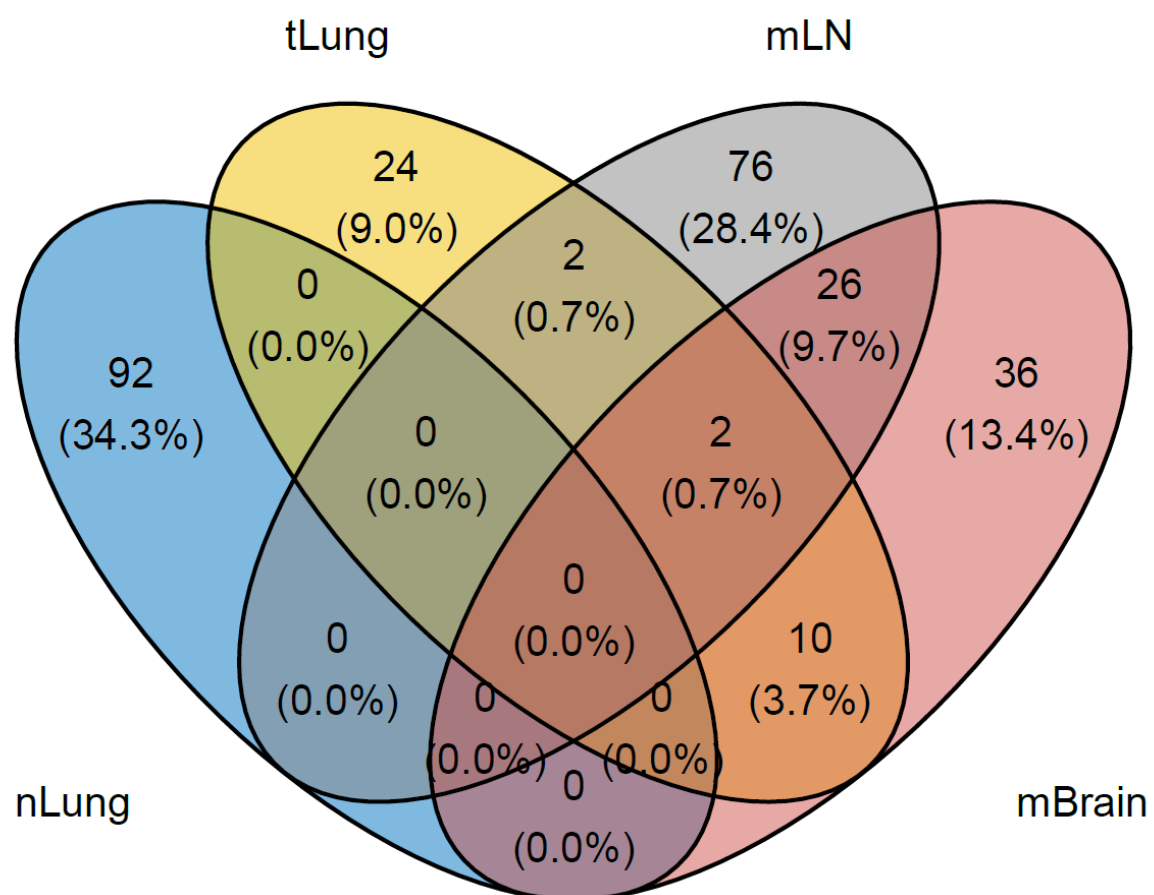

## Tumor cells

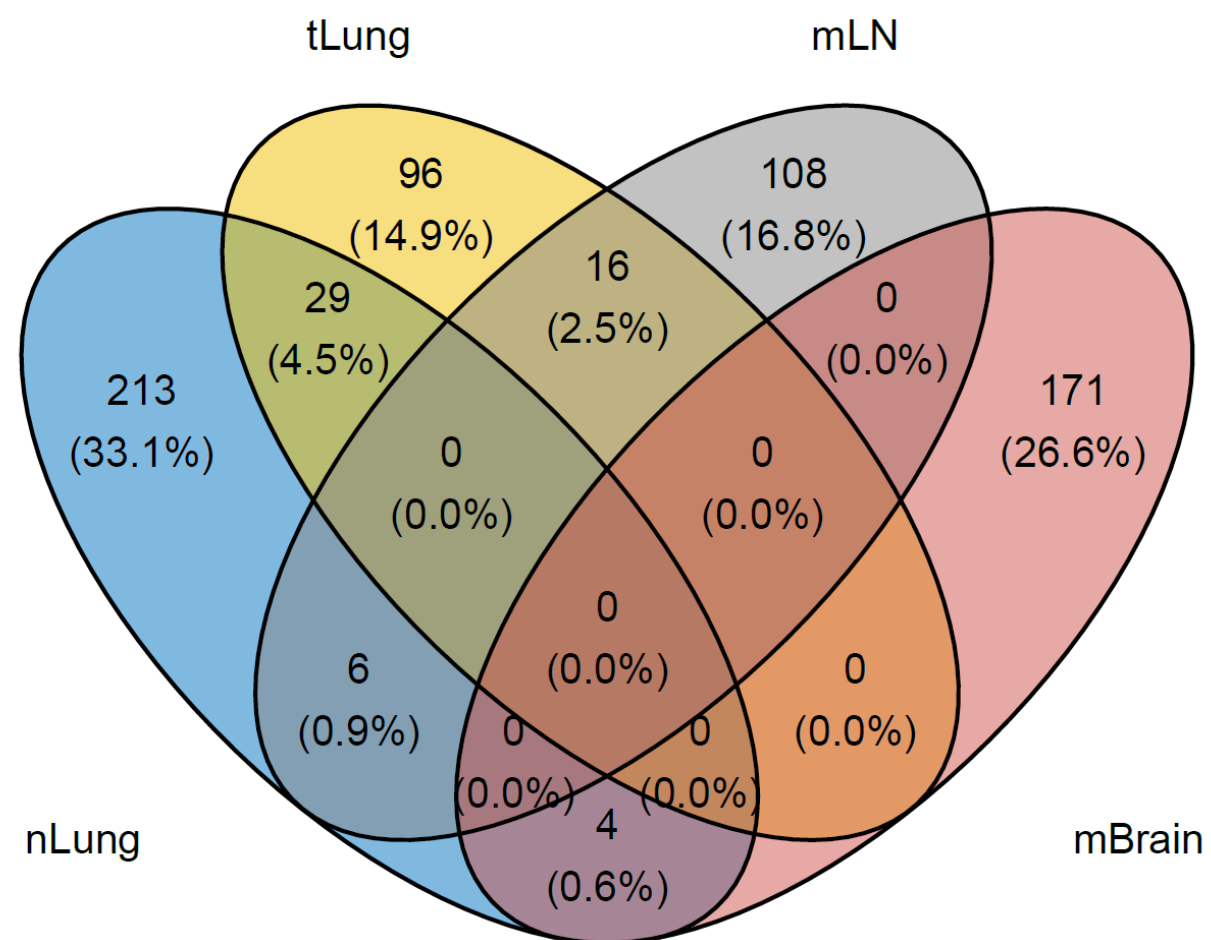

Supplement: mmc2.pdf [file mmc2.pdf]

# pseudotime

Identity

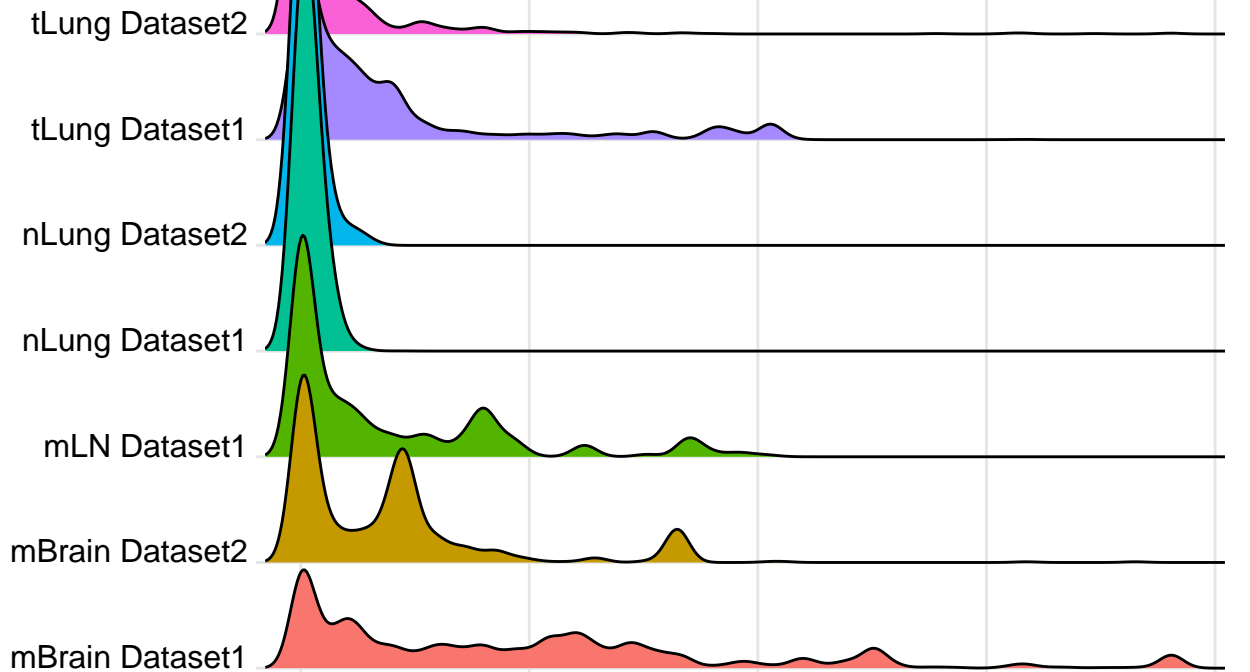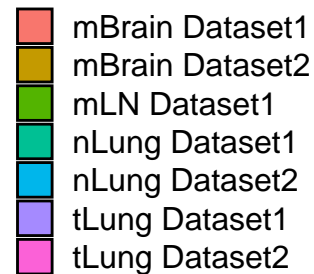

Supplement: mmc4.pdf [file mmc4.pdf]
